# Supplementary material for: Global Fatal Coastal Landslides
Source: Copernicus journal article supplement (doi:10.5194/egusphere-2026-96), 2026-01-19
Supplement: Supplementary file 1 [file GFCL_Database.xlsx]

## Sheet: GFCL Database
Date	Location	Location 2	Country	Latitude	Longitude	Precison (km)	Fatalities	Victim	Tourism season	Reason	Distance from coast	Source	Link	Notes
2022-07-08	Ain Franine beach	Bir El Djir	Algeria	35.7696	-0.526668	0.5	2	unknown			0	Media (French)	https://www.elkhabar.com/fr/actualite/oran-deux-morts-dans-un-effondrement-rocheux-sur-la-plage-d-ain-franine-213373#google_vignette	Two people were found dead following a rock collapse that occurred in the morning on the beach of “Ain El Hamia”
2018-01-08	Las Delicias along avenida Félix Camet Santa Clara del Mar		Argentina	-37.9276	-57.5279	0.05	1	local			0	NASA database	https://www.lanacion.com.ar/sociedad/tragedia-en-mar-del-plata-murio-una-nina-por-el-derrumbe-de-un-acantilado-nid2098978/ https://www.infobae.com/sociedad/2023/01/09/emma-y-una-muerte-que-aun-duele-en-mar-del-plata-los-recuerdos-del-dia-tragico-y-el-peligro-silencioso-de-los-acantilados/	Rocks and dirt falling from the top a cliff resulted in the death of a little girl that was playing there with her family. Erosion seems to be involved in the process of collapse.
1990-01-01	Port Phillip Bay	Melbourne	Australia	-37.9891	145.047	5	1	local			0	Bird 1994	https://www.jstor.org/stable/25735606?seq=1	eral heaps of these boulders indicate past falls (three other minor rock falls occurred on the Beaumaris cliffs during 1990) and it was perhaps unwise of the child's father who came to dig for bait on the shore to tell his son to sit close to the foot of the cliffs. F
1996-09-27	Salter St	Gracetown	Australia	-33.8654	114.983	0.01	9	local		rainfall	0	Newspaper	https://books.google.com/books?id=WbReAAAAIBAJ&pg=PA2&dq=cliff+collapse+kills&article_id=50373519367&hl=en&sa=X&ved=2ahUKEwjl44zQ-YKNAxWDH0QIHQgrCTw4FBDoAXoECAUQAw#v=onepage&q=cliff%20collapse%20kills&f=false	Nine onlookers were killed when a limestone ledge weakened by rain collapsed on top of a group of schoolchildren teachers and parents Friday as they watched an Australian surfing event
2004-02-21	Bangalley head	Avalon Beach	Australia	-33.6246	151.343	0.01	1	tourist		recreation	0	Global Fatal Landslide Database	https://www.smh.com.au/national/tourist-killed-while-being-photographed-at-sunrise-20040222-gdieic.html	8 tonne block slipped down cliff
2021-12-24	Bells Beach		Australia	-38.3659	144.287	1	1	unknown			0	Media	https://www.abc.net.au/news/2021-12-31/police-and-emergency-services-at-an-incident-at-bells-beach/100733532	Investigators were told six people were sitting under the cliff face when three of the six were struck by falling debris
2009-12-31	Praia do Bananal	Ilha Grande	Brazil	-23.1071	-44.2491	0.05	17	tourist		rainfall	0	Global Fatal Landslide Database	https://www.cantonrep.com/story/news/2010/01/02/brazilian-mudslides-kill-at-least/42579463007/	A rain-loosened slab of hillside collapsed on three houses and a waterfront lodge after New Year celebrations at an island resort in Brazil killing at least 17 people authorities said. About 120 rescuers scrambled through mud and toppled trees and lar
2010-01-01	Angra dos Reis	Rio de Janeiro state	Brazil	-23.0137	-44.3225	25	22	unknown			0	NASA database	http://www.cnn.com/2010/WORLD/americas/01/01/brazil.floods/index.html	Lodge and nearby houses were hit by a 300 m wide landslide and went into the sea at 4:30 am
2020-11-17	Pipa Beach	Tibau do Sul	Brazil	-6.22644	-35.0523	0.5	3	local			0	Media	https://www.mirror.co.uk/news/world-news/couple-seven-month-old-baby-23031059	Couple and their seven-month-old baby crushed to death after cliff collapses onto beach
2022-04-02	Praia de Itaguaçu	Ilha Grande	Brazil	-23.8026	-45.3651	0.05	4	unknown		rainfall	0	The Landslide Blog	https://blogs.agu.org/landslideblog/2022/04/04/praia-de-itaguacu-1/	One major landslide occurred at Praia de Itaguaçu a popular beach on Ilha Grande in Angra do Reis (note that there are several beaches with this name in Brazil). There are reports that four people may have been killed. There is a video taken from a boat showing the aftermath of this large landslide that has been widely tweeted such as below:-
2014-09-23	Wreck Beach	Vancouver	Canada	49.2621	-123.262	1	1	unknown			0	Global Fatal Landslide Database	https://vancouver.citynews.ca/2014/09/25/body-recovered-from-a-landslide-at-wreck-beach/	Police aren’t sure if anyone else was caught in a landslide on Wreck Beach after recovering a body there.
2007-04-20	Puerto Aisen		Chile	-45.4436	-72.8086	8	10	unknown		earthquake	0	Global Fatal Landslide Database	https://www.latimes.com/archives/la-xpm-2007-apr-23-fg-quake23-story.html	An earthquake in remote southern Chile set off a landslide of rocks that smashed into a narrow fjord causing massive 25-foot waves that swept away 10 beachgoers.
2024-03-11	Delfin Beach	Posorja	Ecuador	-2.72707	-80.2913	0.01	3	tourist			0	Media (Spanish)	https://www.expreso.ec/guayaquil/desgracia-posorja-tres-ninos-mueren-colapso-monumento-delfin-192737.html	A tragedy on the idyllic Delfín Beach in Posorja Guayas province marred what was supposed to be a moment of relaxation and fun. And it happened right near the cement statue of this iconic marine animal.
1995	Coastal rd PR10	Reunion	France	-20.9117	55.3529	5	1	unknown			0	Media (French)	https://www.zinfos974.com/la-route-du-littoral-la-menace-permanente/	Between these two major collapses other accidents have left their mark such as the one in 1995 when a block of around twenty tonnes killed a DDE engineer at PR 10.
1979-10-16	Nice Airport	Nice	France	43.6481	7.21043	0.01	7	unknown			0	The Landslide Blog	https://blogs.agu.org/landslideblog/2022/02/04/nice-airport-1/	At Nice airport a section of fill slope failed during this event killing seven people. This landslide involved between 2 and 3 million cubic metres of fill that was being emplaced for the new port of Nice but also involved about 7 million cubic metres of the underlying clay-silt giving a total volume of 10 million cubic metres. The diagram below from Seed et al. (1988) provides details of the loc…
1980-06-22	Coastal rd PR2	Reunion	France	-20.8738	55.4258	5	3	unknown		rainfall	0	Media (French)	https://www.zinfos974.com/la-route-du-littoral-la-menace-permanente/	Perhaps the most devastating incident in Réunion Island was the collapse of a cliff face in 1980 at the PR2 highway. This was the first massive collapse on the newly four-lane coastal road in 1976.
1996-01-04	Coastal rd PR5+150	Reunion	France	-20.8842	55.3914	5	1	unknown			0	Media (French)	https://www.zinfos974.com/la-route-du-littoral-la-menace-permanente/	On January 4 1996 at PR 5+150 the 13 km section claimed another victim.
1997-02-17	Coastal rd PR4+100	Reunion	France	-20.8797	55.4001	5	1	unknown			0	Media (French)	https://www.zinfos974.com/la-route-du-littoral-la-menace-permanente/	Two years later on February 17 1997 several blocks totaling more than fifteen tons fell from the cliff at PR 4+100. Most of the blocks remained trapped in the pits created at the foot of the cliff. Unfortunately a block weighing several hundred kilos ended up hitting the car of a 27-year-old driver who was killed instantly.
2004-10-02	Coastal rd	Reunion	France	-20.8979	55.3708	30	1	unknown			0	Media (French)	https://www.zinfos974.com/la-route-du-littoral-la-menace-permanente/	On October 2 2004 a 250 kg block killed an 18-year-old woman at the wheel of her vehicle.
2006-02-20	Coastal rd PR10+900	Reunion	France	-20.9203	55.3471	5	2	unknown		rainfall	0	Media (French)	https://www.zinfos974.com/la-route-du-littoral-la-menace-permanente/	In 2006 in addition to the massive collapse of March 24 two other motorists were killed on February 20 at PR 10+900 where blocks of approximately 180 kg broke away after a very rainy episode.
2006-03-24	Coastal rd PR11+900	Reunion	France	-20.9335	55.3308	5	2	local			0	Media (French)	https://www.zinfos974.com/la-route-du-littoral-la-menace-permanente/	In 2006 the image was just as striking. This time 30000 cubic meters of rock fell from the cliff at PR 11+900. On March 24 shortly before 6 a.m. the flow of motorists was fortunately not yet at its peak. Two deaths were nevertheless to be deplored. Two paramedics trapped under the rubble never completed their journey to Saint-Denis.
2006-10-15	Coastal rd PR3+700	Reunion	France	-20.8789	55.4022	5	1	unknown			0	Media (French)	https://www.zinfos974.com/la-route-du-littoral-la-menace-permanente/	On October 15 at PR 3+700 a block of approximately 40 kg killed a motorist.
2007-02-20	Saint-Denis	Reunion	France	-20.8979	55.3708	15	1	local			0	Media (French)	https://www.lefigaro.fr/actualite/2006/03/27/01001-20060327ARTFIG90190-eboulement_d_une_falaise_deux_morts_a_la_reunion.php	On February 20 an employee of the Saint-Denis nursing school in Réunion was killed on this coastal road where nearly twenty deaths have been reported over the past thirty years. Every year the road is cut by massive rockfalls.
2007-10-15	Saint-Denis	Reunion	France	-20.8979	55.3708	15	2	local			0	Media (French)	https://www.lefigaro.fr/actualite/2006/03/27/01001-20060327ARTFIG90190-eboulement_d_une_falaise_deux_morts_a_la_reunion.php	A mountain section collapsed yesterday at around 5:40 a.m. on the coastal road between Saint-Denis de la Réunion and Le Port killing a 34-year-old man and a woman in her forties.
2008-01-09	Coastal rd	Reunion	France	-20.8979	55.3708	30	1	local		rainfall	0	Media (French)	https://www.zinfos974.com/la-route-du-littoral-la-menace-permanente/	The 2000s were particularly deadly. On January 9 2008 a 36-year-old driver was killed instantly. The driver behind him saw the 50 kg blocks crush the passenger compartment giving the driver no chance and his vehicle continued on for 200 meters before coming to a stop. A heavy rain warning was in effect at the time with the lanes switched to the sea side which did not prevent the accident.
2015-08-14	Petit Ailly beach	Varengeville-sur-Mer	France	49.9166	1.00736	0.3	1	local			0	Media (French)	https://actu.fr/normandie/_76/video-seine-maritime-un-homme-decede-dans-leboulement-dune-falaise_573079.html	A major cliff collapse in Varengeville-sur-Mer near Dieppe (Seine-Maritime) on Friday August 14 2015 at around 2:30 p.m. claimed one victim an 80-year-old shore fisherman.
2022-08-01	Normandie cliffs		France	49.7073	0.193743	100	2	unknown			0	Media (French)	https://www.paris-normandie.fr/id335149/article/2022-08-21/deux-morts-un-enfant-blesse-grave-sur-le-littoral-normand-comment-mieux	Two dead one child seriously injured... On the Normandy coast how can we make the cliffs safer?
2011-12-26	Cape Arkona	Ruegen	Germany	54.6742	13.4342	1.5	1	tourist		rainfall	0	Global Fatal Landslide Database	https://www.spiegel.de/international/germany/girl-missing-in-natural-disaster-erosion-hits-famous-german-coastal-cliffs-a-805876.html	A 10-year-old girl is missing following a landslide at the famous chalk cliffs on the German island of Rügen a popular destination for tourists. Local officials are blaming the recent increase in cliff falls on erosion caused by fluctuating weather con
2011-05-22	Oia	Santorini	Greece	36.4603	25.3796	1.5	1	tourist			0	Global Fatal Landslide Database	https://www.nbcnews.com/id/wbna43138204	A US tourist was killed and another four people injured following a landslide on the Greek holiday island of Santorini reports said Monday. The incident occurred when the tourists were travelling by donkey in the picturesque harbour of Oia on Santorini
2015-05-23	Glyka Nera beach	Crete	Greece	35.2019	24.1078	0.05	1	tourist			0	Global Fatal Landslide Database	https://www.ekathimerini.com/news/197226/tourist-dies-in-rockfall-on-beach-in-crete/	A 36-year-old tourist from the Czech Republic was killed on Sunday night when a boulder fell on her while she was on a beach in Sfakia Crete.
2015-06-17	Sadranan Beach	Gunungkidul	Indonesia	-8.14527	110.604	0.5	3	local			0	Media (Indonesian)	https://news.espos.id/tebing-pantai-sadranan-gunungkidul-longsor-3-orang-tewas-615356	he cliffs of Sadranan Beach Tepus Gunungkidul DIY collapsed Wednesday (6/17/2015) at 15.15 WIB. Three people died in the incident.
2024-11-21	Kota Bani	North Bengkulu	Indonesia	-3.25166	101.632	4	1	local			0	Media (Indonesian)	https://rakyatbengkulu.disway.id/read/691094/begini-kronologi-warga-ketahun-tertimbun-longsor-saat-memancing-di-pantai-kota-bani-bengkulu-utara	Residents of Lubuk Mintai Village Ketahun District North Bengkulu experienced a landslide disaster while fishing in the coastal area of ​​Kota Bani Village Putri Hijau District on November 21 2024 at exactly 20.00 WIB.
2021-03-25	Koveh	Qeshm	Iran	26.9153	56.18	100	1	local			0	Media (Persian)	https://www.irna.ir/news/84661984/%DB%8C%DA%A9-%D9%86%D9%81%D8%B1-%D8%A8%D8%B1-%D8%A7%D8%AB%D8%B1-%D8%B1%DB%8C%D8%B2%D8%B4-%D8%B5%D8%AE%D8%B1%D9%87-%D8%AF%D8%B1-%D9%82%D8%B4%D9%85-%D9%81%D9%88%D8%AA-%DA%A9%D8%B1%D8%AF	A 37-year-old person died due to a coastal cliff collapse in the village of Koveh on the islan
2009-05-29	Tzukei Yam beach		Israel	32.3581	34.857	0.05	1	local			0	Global Fatal Landslide Database	https://www.jpost.com/israel/man-killed-in-netanya-cliff-avalanche	One person was killed and another was injured early yesterday morning in a landslide on a beach near Netanya. Harel Berlin 26 of Kfar Monash was camping with friends under a cliff on the Tzukei Yam beach in the Hefer Valley Regional Council north o
2009-05-30	Kurkar cliff	Netanya	Israel	32.3512	34.8543	0.3	1	local			0	Media (Hebrew)	https://megafon-news.co.il/asys/archives/372557	A 26-year-old man was killed after being trapped under a section of a kurkar cliff that collapsed early in the morning on a beach near the Blue Bay Hotel in Netanya
2011-04-01	Givat Olga	Hadera	Israel	32.4423	34.877	1.5	1	unknown			0	Media (Hebrew)	https://megafon-news.co.il/asys/archives/372557	a 40-year-old man was killed after the cliff he was standing on on Givat Olga in Hadera collapsed and he fell from a height of about 10 meters to the shore
2019-06-01	Bat Yam		Israel	32.0221	34.7385	1.5	1	unknown			0	Media (Hebrew)	https://megafon-news.co.il/asys/archives/372557	Teenager was killed when rocks on a cliff in Bat Yam broke away and he fell onto the beach
1978-06-07	Sant'Angelo	Ischia	Italy	40.6972	13.8929	6	5	tourist			0	Newspaper	https://books.google.com/books?id=_dhHAAAAIBAJ&pg=PA14&dq=beach+landslide+death&article_id=23591244639&hl=en&sa=X&ved=2ahUKEwiOoZmri4ONAxWlEEQIHVBzC78Q6AF6BAgHEAM#v=onepage&q=beach%20landslide%20death&f=false https://www.mdpi.com/2076-3263/13/10/313	Part of a mountainside collapsed on a beach at the holidau Island of Ischia Wednesday killing and injuring foreign sunbathers
2010-04-20	Cala Rossano	Ventotene	Italy	40.7994	13.4305	0.1	2	local			0	Media (Italian)	https://www.lastampa.it/cronaca/2010/04/20/news/frana-sulla-spiaggia-a-ventotene-1.37017716/	Two girls from the "Anna Magnani" middle school in Morena a suburb of Rome were crushed to death this morning by a tuff wall that suddenly collapsed on the beach of Cala Rossano.
2023-06-15	Abbatoggia beach	La Maddalena	Italy	41.2506	9.40344	2	1	tourist			0	Media (Italian)	https://www.ansa.it/sardegna/notizie/2023/06/14/morto-il-turista-colpito-da-un-masso-in-spiaggia_e30773f9-df17-4a09-bf32-a50ba3828df3.html	Piergiorgio Benegaglia the 58-year-old from Novara who died this morning in hospital in Olbia due to a serious abdominal crush caused by the fall yesterday of a large boulder from the rocky ridge overlooking the beach of Abbatoggia
2023-08-25	Piscine di Venere	Baunei coast	Italy	40.1434	9.65448	0.05	1	tourist				IFFI Database	https://www.ilmattino.it/primopiano/cronaca/marina_masia_morta_baunei_sardegna_chi_era-7593820.html	Marina Masia , a 28-year-old medical student at the University of Florence, was crushed to death by a large holm oak trunk while swimming in Ogliastra. Originally from Nuoro , she was swimming at the Piscine di Venere (Venus Pools), on the Baunei coast, when the rock face suddenly collapsed, taking the large tree with it.
1971-07-05	Okuzure Beach	Shizuoka City	Japan	34.9007	138.339	5	1	unknown			1	Media (Japanese)	https://www.mlit.go.jp/notice/noticedata/sgml/068/79000064/79000064.html	On the morning of July 5th an accident occurred on National Route 150 at Okuzure Beach in Shizuoka City where a rockfall caused a rockfall cover to be destroyed resulting in one person being crushed to death by the rocks along with his car.
1989-07-16	Echizen Coast	Fukui Prefecture	Japan	36.0046	135.979	25	15	unknown			0	Media (Japanese)	https://www.jstage.jst.go.jp/article/jsprs1975/28/5/28_5_2/_pdf/-char/ja	a 15-seater minibus was passing by and was involved in the accident resulting in a major disaster in which all 15 people died. Landslide on national route 305 . a much larger amount of rock than expected slumped down crushing the minibus
2020-04-24	Kotsubo	Zushi City	Japan	35.2936	139.558	0.5	1	local			0	Media (Japanese)	https://www.kanaloco.jp/news/social/entry-338479.html#google_vignette	A man was reportedly seen walking his dog near his home on the evening of the 20th and it is possible that he was caught in the landslide while walking his dog. It is unclear when the landslide occurred.
2012-10-13	Andavadoaka beach		Madagascar	-22.0684	43.2397	8	2	tourist				Media	https://www.bbc.com/news/uk-england-20717485#:~:text=Overhanging%20cliff,bleeding%20from%20his%20external%20injuries.	A biologist died instantly when a cliff collapsed on him in Madagascar, an inquest has heard. Nick Paige, 24, who lived in Suffolk and grew up in Hertfordshire, was killed alongside his French colleague Stephanie Bollard, 26, in October. "An overhang above a beach site regularly used for camp fires by our team collapsed."
2024-07-19	St Thomas Bay	Marsascala	Malta	35.85	14.5697	0.05	1	local			0	Media	https://timesofmalta.com/article/woman-injured-rockfall-marsascala.1095598	Mirabelle Falzon has been identified as the 22-year-old woman who died on Friday after being crushed under a rockfall in Marsascala.
2011-07-01	Rothesay Bay	Auckland	New Zealand	-36.7207	174.751	0.05	1	local			0	Global Fatal Landslide Database	https://www.stuff.co.nz/national/5224236/Woman-killed-by-falling-rocks	A woman was crushed by rocks falling from a cliff while walking her dog on Saturday. Initial reports from police said the 40-year-old woman had fallen from a clifftop walkway above Rothesay Bay on Auckland’s North Shore.
2005-08-01	Seven Sisters waterfall	Giaranger Fjord	Norway	62.1076	7.09468		1	unknown			0	Global Fatal Landslide Database		One man was killed and others were initially feared injured Tuesday afternoon when a rockslide along a popular west coast fjord crashed down on the kayaks they were paddling. The kayakers were paddling in the Giaranger Fjord near the waterfalls known as
2007-10-15	Sognfjord		Norway	61.1179	6.39305	47.483	1	local			0	Global Fatal Landslide Database	https://www.upi.com/Top_News/2007/10/16/Rock-kills-woman-on-Norwegian-highway/15131192560840/	A Norwegian woman died Tuesday morning when a large rock rolled down a mountainside and crashed through her windshield. The woman was alone in the car when it was hit by the rock described as being about 18 inches in diameter Aftenposten reported. She
1995-06-21	Costa Verde		Peru	-12.0957	-77.0773	7	1	tourist		earthquake	0	Media (Spanish)	https://elcomercio.pe/lima/costa-verde-20-anos-heridos-muertos-caida-rocas-264474-noticia/?ref=ecr	Journalist Frederic Chappaz head of the France Press news agency in Lima died after being hit by a rock that fell from the cliff of the Costa Verde following the 4.9 magnitude earthquake on the Richter scale that shook the central coast of the country from Trujillo to Cañete.
2002-01-03	Costa Verde		Peru	-12.0957	-77.0773	7	1	local			0	Media (Spanish)	https://elcomercio.pe/lima/costa-verde-20-anos-heridos-muertos-caida-rocas-264474-noticia/?ref=ecr	The young Carlos Pardo Figueroa who was driving to work along the Costa Verde beach circuit lost his life as a result of a rock falling and hitting his vehicle.
2023-11-01	Costa Verde	La Herradura	Peru	-12.1742	-77.0333	5	1	unknown			0	Media (Spanish)	https://rpp.pe/lima/actualidad/chorrillos-mujer-murio-por-caida-de-roca-de-70-kg-desde-acantilado-de-la-costa-verde-noticia-1515024	oman identified as Maritza Marina Huallpa died after the car she was traveling in was crushed by a rock weighing approximately 70 kilos that fell from the cliff of Costa Verde in the district of Chorrillos .
2022-04-14	Pilar	Leyte	Philippines	10.717	125.04	0.01	53	unknown		rainfall	0	The Landslide Blog	https://blogs.agu.org/landslideblog/2022/05/03/pilar-landslide-1/	One of the largest landslides triggered by Tropical Storm Megi last month occurred at Pilar a little to the southeast of the town of Abuyong in Leyte. This location which is also known as Dang’s Beach Resort suffered from one of the three very large landslides during the storm. It is located at 10.717 125.040. The latest NDRRMC situation report lists 53 known fatalities at this site.
2005-08-04	Beach 60 mi from Lisbon	Lisbon	Portugal	38.6927	-9.29184	100	2	tourist			0	Global Fatal Landslide Database		A rock slide in Portugal claimed two victims which local authorities said they believe were a Spanish couple on vacation. Portuguese police said Friday they were hoping to find evidence of their identification in a car found near the scene at a beach
2009-08-20	Maria Luisa beach	Albufeira	Portugal	37.0891	-8.20135	0.5	5	tourist			0	Global Fatal Landslide Database	https://www.france24.com/en/20090822-five-tourists-killed-beach-landslide-	At least five people have died and several others have been injured in a landslide at a beach in the Algarve southern Portugal officials say. A 60-year-old man and four women - two under the age of 25 - were killed when part of a cliff collapsed on th
2018-03-16	Praia da Ursa	Sintra	Portugal	38.7905	-9.49245	0.05	1	tourist			0	Media (Spanish)	https://www.elmundo.es/internacional/2018/03/16/5aab9b93268e3ea34b8b4621.html	A 23-year-old Brazilian tourist was crushed to death by a rock avalanche at Praia da Ursa (Sintra) one of the most popular beaches in the Lisbon metropolitan area. An 18-year-old German woman was also seriously injured in the accident while three other people were treated for minor injuries and bruises.
2022-04-21	Umdloti	Durban	South Africa	-29.6663	31.1227	1.5		unknown		rainfall	0	The Landslide Blog	https://blogs.agu.org/landslideblog/2022/04/22/durban-1/	Ground adjacent to the sea from Durban to Mtunzini (a coastal town 140km north of Durban) is almost exclusively made up of ancient red sand dunes termed the Berea formation. South of the Durban harbour these sands form a ridge called the Bluff and north of the harbour they form the Berea Ridge. In some places these sand dunes are extremely steep…The investigation showed the slopes’ stability was …
1927-11-03	Torre de Hercules	A Coruna	Spain	43.3858	-8.40608	0.5	1	unknown				Inventory of rockfalls in Spain from 1800 to 2021		beach/cliff
1960-09-02	Cala Estellenchs	Formentera	Spain	39.6583	2.47136	0.2	1	unknown				Inventory of rockfalls in Spain from 1800 to 2021		beach/cliff
1961-03-25	Santa Cruz de Tenerife		Spain	28.4392	-16.2758	4	1	unknown				Inventory of rockfalls in Spain from 1800 to 2021		beach/cliff
1961-07-09	Playa de la fuente de la Salud	Torremolinos	Spain	36.5985	-4.51004	0.1	4	unknown				Inventory of rockfalls in Spain from 1800 to 2021		beach/cliff
1985-07-21	Playa de Santa María del Mar	Cadiz	Spain	36.5204	-6.28686	0.5	4	unknown				Inventory of rockfalls in Spain from 1800 to 2021		beach/cliff
1993-05-01	Acantilados de Pasaia	Pasaia	Spain	43.3619	-1.87379	6	1	unknown				Inventory of rockfalls in Spain from 1800 to 2021		beach/cliff
1994-09-01	acantilados de Tazones	Villaviciosa	Spain	43.548	-5.39694	1.5	1	unknown				Inventory of rockfalls in Spain from 1800 to 2021		beach/cliff
1997-07-12	Playa Los Caños de la Meca	Barbate	Spain	36.1866	-6.02358	0.3	1	unknown				Inventory of rockfalls in Spain from 1800 to 2021		beach/cliff
2003-08-25	Cala Sr. Ramon	Santa Cristina d'Aro	Spain	41.7575	2.97677	0.05	1	local			0	Inventory of rockfalls in Spain from 1800 to 2021	https://www.elmundo.es/elmundo/2003/08/25/sociedad/1061823900.html	in this cove on the Costa Brava, normally frequented by nudists, when, for reasons still unknown, four or five rocks, each half a meter high, fell onto the terrace of a beach bar where several people were present. One of these rocks fell directly on the head of the bather, who was killed.
2006-08-06	Playa de la Masca	Buenavista del Norte	Spain	36.1865	-6.02346	0.5	1	unknown				Inventory of rockfalls in Spain from 1800 to 2021		beach/cliff
2009-03-05	La Tejita Beach	Tenerife	Spain	28.0316	-16.5558	1	1	unknown			0	Global Fatal Landslide Database		A 36 year old man died on Friday after being crushed by a rockfall whilst sunbathing on Tejita Beach near El Medano S. Tenerife
2009-10-31	Playa de los Gigantes	Tenerife	Spain	28.2475	-16.8404	0.05	2	tourist			0	Global Fatal Landslide Database	https://www.reuters.com/article/idUSL1221423	A landslide has killed at least two people one of them a British women and may have buried another two on the popular holiday island of Tenerife in the Canary Islands the Spanish government has said.
2014-08-18	Playa Cau de Sa Guineu	Cadaques	Spain	42.2947	3.29099	0.05	1	unknown				Inventory of rockfalls in Spain from 1800 to 2021		beach/cliff
2016-09-02	Conil de la Frontera	Cadiz	Spain	36.2635	-6.0874	1.5	1	local			0	Media (Spanish) and Inventory of rockfalls in Spain from 1800 to 2021	https://www.elmundo.es/andalucia/2016/09/03/57ca98a546163f47028b45fe.html	A woman died on Friday afternoon in Conil de la Frontera (Cádiz) after being hit by a rock and earth slide from a slope overlooking the sea.
2018-03-31	As Catedrais	Galician coast	Spain	43.554	-7.15729	0.05	1	tourist		rainfall	0	Media & paper (Bergillos et. al 2020) & Inventory of rockfalls in Spain from 1800 to 2021	https://english.elpais.com/elpais/2018/04/10/inenglish/1523359639_300167.html &Inventory of rockfalls in Spain	Vidal Romaní is speaking in the wake of the death there during Easter of a 25-year-old tourist who was killed by a falling rock while admiring the incredible formations shaped by the sea along the northern Galician coas
2019-07-02	Cala Vinyes, Calvià		Spain	39.4943	2.53612	1	1	unknown			0	Inventory of rockfalls in Spain from 1800 to 2021	https://www.elmundo.es/baleares/2019/07/02/5d1b05affdddff52948b45e8.html	There, a young couple who had spent the afternoon watching the sunset and nightfall felt the rock they were standing on split open, dragging them down the cliff with it
2021-09-14	Cala Sa Nau- Cala Mitjana		Spain	39.3927	3.24829	0.5	2	tourist				Inventory of rockfalls in Spain from 1800 to 2021	https://www.lacrux.com/en/klettern/Climber-had-a-fatal-accident-at-deep-water-soloing-in-mallorca/	climbers
2022-08-23	Alojera beach	Tenerife	Spain	28.1615	-17.3357	0.05	1	local			0	Media (Spanish)	https://www.eldia.es/la-gomera/2022/08/25/conmocion-alojera-taco-muerte-oliver-73839290.html	due to a rockfall on Alojera beach
2024-06-19	Carabeo beach	Nerja	Spain	36.7465	-3.87256	1	1	tourist			0	Media (Spanish)	https://www.diariosur.es/sucesos/muere-joven-anos-tras-precipitarse-acantilado-nerja-20240620084502-nt.html?ref=https%3A%2F%2Fwww.diariosur.es%2Fsucesos%2Fmuere-joven-anos-tras-precipitarse-acantilado-nerja-20240620084502-nt.html	main hypothesis is that it occurred accidentally while he was crossing a path the Carabineros trail which has been closed to the public by order of the Coastal Demarcation since 2002 due to the risk of rockfall.
2024-07-18	Es Copinar Beach	Formentera	Spain	38.6647	1.51197	3	1	tourist			0	Media (Spanish)	https://www.antena3.com/noticias/sociedad/tragedia-formentera-muere-bebe-dos-meses-desprendimiento-rocas-formentera_202407186699170da548610001519d59.html	The family had chosen a sheltered area under a ledge made of clayey material a common feature along this stretch of coastline to enjoy a day at the beach. At one point at least ten meters of this material collapsed in compact blocks from a height of about two meters falling on the father and his daughter.
2005-11-13	Rocky Bay	Grenadine Island of Bequia	St Vincent	13.0125	-61.2316		2	unknown		rainfall	0	Global Fatal Landslide Database	https://stormcarib.com/reports/2005/stvincent.shtml	The 27th tropical depression of the 2005 hurricane season is already being blamed for two deaths on the island of St. Vincent & the Grenadines. Authorities yesterday claimed two fishermen who were camping with eight others near Rocky Bay on the Grenadin
2010-10-20	Suhua highway		Taiwan	24.3255	121.748		2	tourist		rainfall	1	Global Fatal Landslide Database	https://www.whittierdailynews.com/2010/10/22/3-dead-27-missing-after-typhoon-hits-taiwan/	Two buses carrying Chinese tourists were on a six-mile (10-kilometre) stretch of a coastal highway in Ilan that was hit by at least seven rockslides Thursday night Premier Wu Den-yih said. Nineteen people on one bus were rescued — five with light to m
2010-10-09	White Sand Beach	Chang Island	Thailand	12.1031	102.274	0.5	1	tourist		rainfall	0	Global Fatal Landslide Database	https://democracyforburma.wordpress.com/2010/10/11/one-woman-dead-one-man-seriously-injured-in-koh-chang-landslide/	A mudslide on Thailand's popular Chang Island killed at least one person Monday and swept away several bungalows media reports said. Torrential rains that started Sunday night washed away part of the mountainside near White Sand beach hitting the ring
2024-12-08	Arhavi		Turkey	41.3377	41.2635	0.01	4	local			0	The Landslide Blog	https://eos.org/thelandslideblog/arhavi-landslide-1	On 8 December 2024 a very large landslide occurred at Arhavi in the Artvin area of Turkey killing four people in a car that was travelling along the coastal highway.
2005-06-22	Kacha	Sevastopol	Ukraine	44.7835	33.5364	0.5	1	tourist		rainfall	0	Media (Russian)	https://www.upi.com/Top_News/2005/06/22/Landslide-buries-beach-killing-teenager/52031119430444/ https://ru.krymr.com/a/krym-opolzni-plyazhi-turisty-gibnut/31450353.html	A landslide has hit a beach on Ukraine's Black Sea coast killing a 16-year-old Russian girl and trapping several other people.
2010-08-27	Nikolaevka	Crimea	Ukraine	44.9595	33.6055	3	2	tourist		rainfall	0	Global Fatal Landslide Database	https://archive.kyivpost.com/article/content/ukraine-politics/landslide-on-crimean-beach-kills-two-russian-citiz-80235.html	landslide which occurred on the savage beach in the resort village of Nikolaevka in Simferopol district of Crimea on August 28 has killed two Russian citizens from Briansk.
2011-07-26	Nikolaevka	Crimea	Ukraine	44.9595	33.6055	3	1	tourist			0	Media (Russian)	https://www.meteoprog.com/ru/news/24541-opolzen-na-plyaze-v-krymu-ubil-turistku.html	"The woman was sunbathing not right next to the shore but in the middle of the beach where there had been a landslide the night before. She got up to smoke. Apparently she didn't want to smoke on those around her so she went to the place where the ground had caved in. And then there was a roar - and she was already up to her neck in the ground. People rushed to dig her out.
2023-08-06	Fontanka	Odessa	Ukraine	46.5594	30.8669	2	1	tourist			0	Media (Russian)	https://esp.md/ru/sobytiya/2023/08/06/v-odesskoy-oblasti-iz-za-opolznya-na-plyazhe-pogib-desyatiletniy-malchik	a landslide occurred on the Black Sea coast in the village of Fontanka in the Odessa region . A ten-year-old boy was buried under soil the State Emergency Service of Ukraine reported .
1977-02-20	Lulworth Cove	England	United Kingdom	50.6186	-2.24976	0.5	2	local		rainfall, recreation	0	Newspaper	https://books.google.com/books?id=WgBaAAAAIBAJ&pg=PA5&dq=cliff+collapse+kills&article_id=49083675488&hl=en&sa=X&ved=2ahUKEwjGmfyD94KNAxWMLkQIHbblOFIQ6AF6BAgGEAM#v=onepage&q=cliff%20collapse%20kills&f=false	In March 1977 there was a Category 4 accident at Lulworth Cove on the south coast of England when a school group was digging for fossils at the base of the cliff. A sudden massive cliff fall when hundreds of tons of rock shale and clay collapsed on to the shore killed a school teacher and one of her students; another student died later in hospital. The cliffs here are unstable particularly after …
2001-01-01	Nefyn Bay	North Wales	United Kingdom	52.937	-4.5297	0.01	1	unknown		rainfall	0	NASA database	https://www.bgs.ac.uk/case-studies/nefyn-bay-north-wales-landslide-case-study/	On 2 January 2001 a fatal landslide occurred in the coastal village of Nefyn on the Lleyn Peninsula. A series of slides swept two cars over the cliff and onto the beach below. Tragically one of the occupants was killed and another seriously injured in t
2006-12-31	Whitehaven coast	Cumbria	United Kingdom	54.5429	-3.60236	1.5	1	local		rainfall	0	Global Fatal Landslide Database	https://www.thetimes.com/uk/crime/article/woman-killed-by-landslide-on-beach-after-a-day-of-gales-5tgwkq0xtvs	A stroll along a beach ended in horror yesterday when a woman was killed by a landslide in front of her partner. Passers-by clawed at the earth with their hands in a desperate attempt to reach her at South Beach Whitehaven Cumbria. She was named last
2007-01-02	Whitehaven Cumbria		United Kingdom	54.5494	-3.5875	5	1	unknown			0	NASA database	http://www.timesonline.co.uk/tol/newspapers/sunday_times/britain/article1288510.ece	1 killed on beach when sand slid from cliff
2010-01-06	Sandy Bay	Northumberland	United Kingdom	55.1709	-1.51984	1	1	local		ice	0	Media	http://news.bbc.co.uk/2/hi/uk_news/england/tyne/8444741.stm	An angler has died after the cliff face he was standing on collapsed due to icy conditions in Northumberland. The man who has not yet been named was fishing from the cliff top at Sandy Bay near Newbiggin on Wednesday.
2012-07-24	Dorset	Bridport	United Kingdom	50.7033	-2.74111	1	1	tourist		wave erosion	0	Media	https://www.theguardian.com/uk/2012/dec/18/dorset-cliff-collapse-death-inquest https://www.bbc.com/news/uk-england-20756703	A family walk along a beach on one of the warmest days of the summer ended in tragedy when a section of cliff crumbled and 400 tonnes of rocks crushed a young woman,
2015-06-17	Llantwit Major	Wales	United Kingdom	51.393	-3.46871	3	1	local		unknown	0	Global Fatal Landslide Database	https://www.theguardian.com/uk-news/2015/jun/19/woman-found-dead-south-wales-beach-rockfall	A 23-year-old woman has died after a rock fell on her head on a beach in south Wales.
2017-01-13	Thorpeness beach	Suffolk	United Kingdom	52.1776	1.61544	1.5	1	local		rainfall	0	Global Fatal Landslide Database	https://metro.co.uk/2017/01/14/dog-walker-trapped-and-killed-by-falling-cliffs-on-suffolk-beach-6382025/	A dog walker in his late 50s has been killed after part of a cliff collapsed on top of him. Emergency services rushed to Thorpeness Beach in Suffolk at 1.15pm on Saturday after reports that a man and his pet were trapped under the rubble. Manhattan sink
2018-08-08	Seaton Garth	Yorkshire	United Kingdom	54.5586	-0.789207	0.01	1	tourist			0	Media	https://www.bbc.com/news/uk-england-york-north-yorkshire-45122808	A nine-year-old girl died from serious head injuries when rocks fell from a cliff at a beach in North Yorkshire.
2019-07-16	Sandymouth Beach	Cornwall	United Kingdom	50.8616	-4.55676	0.05	1	unknown			0	Media	https://www.bbc.com/news/uk-england-cornwall-49010336	A man has died during a cliff collapse at a beach on the north coast of Cornwall.
1941-02-02	Sunset Cliffs	San Diego	United States	32.7333	-117.257	1.5	2	unknown			0	Media	https://www.sandiegoreader.com/news/1988/may/19/cover-the-deadly-view-from-sunset-cliffs/	One Sunday in February 1941 Clytie and her friend Betty de Armand decided to have a picnic on the beach after Sunday school. They wandered farther than they had intended and were exploring a narrow canyon between two cliffs when Betty looked up and noticed the surface above them starting to crumble.
1962-02-12	Pescadero point	San Diego	United States	32.739	-117.255	0.05	3	local		recreation	0	Media	https://www.sandiegoreader.com/news/1988/may/19/cover-the-deadly-view-from-sunset-cliffs/	Several teenage boys had developed a Tom Sawyer-like cave at the foot of Pescadero. Unlike Tom’s limestone excavation however the sandstone afforded the boys an opportunity to dig further “rooms” and create a personalized retreat. They took advantage of a holiday Lincoln’s birthday 1962 to expand their getaway. There had been recent rains which made the cave walls soft enough for further digging …
1973-02-11	Del mar park	San Diego	United States	32.7427	-117.255	0.01	4	tourist			0	Media	https://www.sandiegoreader.com/news/1988/may/19/cover-the-deadly-view-from-sunset-cliffs/	On the morning of February 11 1973 police and lifeguards made note of a cave that had collapsed during the night beneath the corner of Coronado Avenue and Bacon Street — the site of the Forties’ fatal cave-in that killed Clytie Purvis. This time there seemed to be no signs of human habitation. Six weeks later the morning after a rainstorm a boy walking his dog on the cliff noticed what he thought…
1973-02-11	Big Sur	Big Sur	United States	36.2075	-121.74	8	1	local		rainfall	0	Newspaper	https://books.google.com/books?id=rcVKAAAAIBAJ&pg=PA1&dq=cliff+collapse+kills&article_id=27082213542&hl=en&sa=X&ved=2ahUKEwiW0pKD-YKNAxV5JUQIHZt8C2o4ChDoAXoECAYQAw#v=onepage&q=cliff%20collapse%20kills&f=false	A highway worker was buried when a 100-yard chunk of storm-soaked State Highway 1 dropped down a canyon cliff
1973-08-20	Longnook Beach	Truro Massachusetts	United States	42.0204	-70.0383	1	1	tourist			0	Newspaper	https://books.google.com/books?id=tqMgAAAAIBAJ&pg=PA5&dq=cliff+collapse+kills&article_id=53932932695&hl=en&sa=X&ved=2ahUKEwjGmfyD94KNAxWMLkQIHbblOFIQ6AF6BAgKEAM#v=onepage&q=cliff%20collapse%20kills&f=false	Sand cliff collapsed at Longnook Beach claiming the life of one boy buried before he could run to safety. Police said the collapse of the sand wall Monday came as two boys were walking under it
1976-05-01	Del Mar	San Diego	United States	32.9695	-117.269		1	tourist		rainfall, wind	0	Kuhn 1977	Kuhn 1977	"A recently reported fatality occured in May 1976 when a tourist asleep in a cave was buried when rain and wind collapsed the bluff face. This cave was initially dug out of the bluff face adjacent to a pedestrian foot path.
1984-09-09	Santa Barbara	Santa Barbara	United States	34.4175	-119.651	8	1	local			0	Newspaper	https://books.google.com/books?id=9V1OAAAAIBAJ&pg=PA4&dq=cliff+collapse+kills&article_id=34481679446&hl=en&sa=X&ved=2ahUKEwjGmfyD94KNAxWMLkQIHbblOFIQ6AF6BAgMEAM#v=onepage&q=cliff%20collapse%20kills&f=false	cliff collapsed atop the beach where they were sunbathing buring them in rocks and dirt
1995-01-22	Torrey Pines	San Diego	United States	32.9367	-117.262	1	2	tourist			0	Media	https://www.sandiegouniontribune.com/2008/08/21/beach-goer-dies-after-cliff-collapses/	"Two tourists Timothy Silcox 33 and David Shulin 35 were killed Jan. 22 1995 when a sea bluff collapsed on them at Torrey Pines State Reserve. Merrell Davis 52 of Mission Hills was buried up to his chest and suffered a leg fracture in that collapse.
2000-01-16	Stonesteps Encinitas	San Diego	United States	33.0529	-117.3	0.05	1	local			0	Media	https://www.latimes.com/archives/la-xpm-2000-jan-16-mn-54646-story.html	Encinitas resident Rebecca Kowalczyk 30 died near the same area January 16 2000 when a 110-yard-wide chunk of bluff fell on top of her and buried her. Kowalczyk was on the Leucadia beach watching her husband surf when she was killed the LA Times reported.
2002-07-17	Carlsbad	San Diego	United States	33.1028	-117.32	1.5	1	local			0	Media	https://www.sandiegouniontribune.com/2008/08/21/beach-goer-dies-after-cliff-collapses/	On July 17 2002 a 39-year-old man James Franklin died when the cave he used for shelter at South Carlsbad State Beach collapsed on him
2006-12-13	Ocean Beach	San Francisco	United States	37.7341	-122.508	1.5	1	local		rainfall	0	Global Fatal Landslide Database	https://www.sfgate.com/bayarea/article/san-francisco-body-found-under-sand-on-beach-2543114.php	A 49-year-old homeless man was found dead at the south end of Ocean Beach on Thursday morning after he apparently was smothered by sand while he slept on the shore officials said. A person walking a dog on the beach near Sloat Boulevard around 8:15 a.
2008-08-19	Torrey Pines State Beach	San Diego	United States	32.9141	-117.259	1	1	tourist			0	Global Fatal Landslide Database	https://www.surfer.com/news/man-dies-blacks-cliffslide-torrey-pines-8-21-08 https://www.latimes.com/archives/la-xpm-2008-aug-21-me-torreypines21-story.html#:~:text=A%2057%2Dyear%2Dold%20man,of%20the%20danger%20of%20collapses.&text=The%20most%20important%20California%20stories,from%20the%20Los%20Angeles%20Times.&text=Tony%20Perry%20is%20the%20former,for%20the%20Los%20Angeles%20Times.	A visit to Torrey Pines State Beach in La Jolla California turned tragically fatal yesterday as a collapse in the cliff side led to the death of a 57-year-old beachgoer. The man who has yet to be publicly identified died at Scripps Memorial Hospital
2015-03-20	Arch Rock	Point Reyes	United States	37.9874	-122.814	1.5	1	local			0	Global Fatal Landslide Database	https://abcnews.go.com/US/hiker-dead-critical-cliff-collapse-point-reyes-national/story?id=29830689 https://www.pressdemocrat.com/article/news/witnesses-recount-fatal-point-reyes-cliff-collapse/	One hiker is dead and another was in critical condition today after they were caught in a rockslide near Arch Rock in Point Reyes National Seashore.
2016-08-16	Torrey Pines	San Diego	United States	32.9191	-117.259	2	1	tourist			0	Media	https://www.sandiegouniontribune.com/2008/08/21/beach-goer-dies-after-cliff-collapses/	A popular strip of Torrey Pines State Beach has been temporarily closed after a section of the cliffs gave way yesterday and sent a fatal shower of sand and boulders onto a 57-year-old tourist below.
2019-02-22	Fort Funston	San Francisco	United States	37.7192	-122.506	0.5	1	local			0	Media	https://www.sfgate.com/bayarea/article/sf-beach-landslide-Kyra-Sunshine-Scarlet-13652962.php	The 22-year-old was walking with her dog and a friend at the beach at about 2:30 p.m. on Feb. 22 when the landslide occurred, trapping both women and the dog beneath a mound of sand and dirt.
2019-08-02	Grandview Beach Encinitas	San Diego	United States	33.0764	-117.31	0.01	3	local			0	Media	https://www.encinitasadvocate.com/news/story/2019-08-02/at-least-one-killed-in-encinitas-beach-bluff-collapse	Three people were killed when an oceanfront bluff collapsed Friday at Grandview beach in the Leucadia area of Encinitas, authorities said.
2020-12-02	Haines	Alaska	United States	59.219	-135.412	0.01	2	local		rainfall	0	The Landslide Blog	https://blogs.agu.org/landslideblog/2022/08/03/haines/	The Beach Road landslide was triggered by an “atmospheric river” that generated rain-on-snow which is dangerous combination for landslide initiation. The failure started as a debris avalanche that transitioned into a debris flow.
2023-11-20	Wrangell	Alaska	United States	56.3239	-132.344	1.5	3	local		rainfall	0	The Landslide Blog	https://eos.org/thelandslideblog/the-deadly-20-november-2023-landslide-near-wrangell-in-alaska-usa	At about 9 pm local time on 20 November 2023, a large landslide occurred near to Wrangell in Alaska, USA. At the time of writing, three people have been confirmed to have been killed (including a child), whilst a further three are reported to be missing. Rescue operations are ongoing.
2024-12-17	Efate Island	Port Vila	Vanuatu	-17.7471	168.318	3		unknown		earthquake	1	The Landslide Blog	https://eos.org/thelandslideblog/efate-landslides-1	Many landslides occurred including some that blocked roads and buried a wharf in the city. Two bridges also collapsed…A landslide struck the international shipping terminal of Port Vila…Another landslide buried a bus resulting in multiple deaths…Landslides were also reported in outlying villages and islands while three bridges were damaged to a point that they were at high risk of collapsing in c…

## Sheet: Supplemental
Date	Location	Location 2	Country	Latitude	Longitude	Precison (km)	Fatalities	Victim	Reason	Distance from coast	Source	Link	Type	Notes
Date	Location		Country	Latitude	Longitude		Total Deat		Disaster T		Source			DisNo.	Historic	Classifica	Disaster G	Disaster S	Disaster_1	External I	Event Name	ISO	Subregion	Region	Origin	Associated	OFDA/BHA R	Appeal	Declaratio	AID Contri	Magnitude	Magnitud_1	River Basi	Start Year	Start Mont	Start Day	End Year	End Month	End Day	No. Injure	No. Affect	No. Homele	Total Affe	Reconstruc	Reconstr_1	Insured Da	Insured _1	Total Dama	Total Da_1
1906-04-18	San Francisco (California)		United States of America	38	-122		700		Earthquake		EM_DAT			1906-0013-USA	1	nat-geo-ear-gro	Natural	Geophysical	Ground movement			USA	Northern America	Americas		Fire	0	0	0		8	Moment Magnitude		1906	4	18	1906	4	18			84564	84564			180000	6284036	524000	18293527
1908-12-28	Messina, Regio, Calabria, Sicilia		Italy	38	16		75000		Earthquake		EM_DAT			1908-0007-ITA	1	nat-geo-ear-gro	Natural	Geophysical	Ground movement			ITA	Southern Europe	Europe		Tsunami/Tidal wave	0	0	0		7	Moment Magnitude		1908	12	28	1908	12	28		150000		150000					116000	4049712
1914-05-08	Catania, Etna		Italy	38	15		120		Earthquake		EM_DAT			1914-0028-ITA	1	nat-geo-ear-gro	Natural	Geophysical	Ground movement			ITA	Southern Europe	Europe			0	0	0		5	Moment Magnitude		1914	5	8	1914	5	8			669	669
1914-11-27	Leukas Isl.		Greece	39	21		14		Earthquake		EM_DAT			1914-0030-GRC	1	nat-geo-ear-gro	Natural	Geophysical	Ground movement			GRC	Southern Europe	Europe		Tsunami/Tidal wave	0	0	0		6	Moment Magnitude		1914	11	27	1914	11	27
1918-02-13	Kwangtung (Guangdong)		China	24	117		10000		Earthquake		EM_DAT			1918-0020-CHN	1	nat-geo-ear-gro	Natural	Geophysical	Ground movement			CHN	Eastern Asia	Asia		Tsunami/Tidal wave	0	0	0		7	Moment Magnitude		1918	2	13	1918	2	13
1927-11-30			Greece	38	23		103		Earthquake		EM_DAT			1928-0001-GRC	1	nat-geo-ear-gro	Natural	Geophysical	Ground movement			GRC	Southern Europe	Europe			0	0	0			Moment Magnitude		1928			1928
1928-08-04	Flores sea		Indonesia	-8	122		128		Earthquake		EM_DAT			1928-0012-IDN	1	nat-geo-ear-tsu	Natural	Geophysical	Tsunami			IDN	South-eastern Asia	Asia	Volacno and landslide		0	0	0		3	Moment Magnitude		1928	8	4	1928	8	4
1930-11-26	Idu (Honshu)		Japan	35	139		259		Earthquake		EM_DAT			1930-0012-JPN	1	nat-geo-ear-gro	Natural	Geophysical	Ground movement			JPN	Eastern Asia	Asia			0	0	0		7	Moment Magnitude		1930	11	26	1930	11	26	1825		24297	26122
1932-09-09	Ambon Isl., Ceram Isl.		Indonesia	-4	128				Earthquake		EM_DAT			1932-0019-IDN	1	nat-geo-ear-gro	Natural	Geophysical	Ground movement			IDN	South-eastern Asia	Asia		Tsunami/Tidal wave	0	0	0			Moment Magnitude		1932	9	9	1932	9	9			365	365
1939-05-01	Honshu		Japan	40	140		27		Earthquake		EM_DAT			1939-0026-JPN	1	nat-geo-ear-gro	Natural	Geophysical	Ground movement			JPN	Eastern Asia	Asia		Tsunami/Tidal wave	0	0	0		7	Moment Magnitude		1939	5	1	1939	5	1	52		1437	1489
1940-08-05	Liaoning province		China	40	122				Earthquake		EM_DAT			1940-0034-CHN	1	nat-geo-ear-gro	Natural	Geophysical	Ground movement			CHN	Eastern Asia	Asia			0	0	0		6	Moment Magnitude		1940	8	5	1940	8	5			5950	5950
1945-01-13	Mikawa (Near Nagoya, Honshu Isl.)		Japan	35	137		2306		Earthquake		EM_DAT			1945-0015-JPN	1	nat-geo-ear-gro	Natural	Geophysical	Ground movement			JPN	Eastern Asia	Asia		Tsunami/Tidal wave	0	0	0		7	Moment Magnitude		1945	1	13	1945	1	13	896		21663	22559
1947-10-06	Pylia (Messinia)		Greece	37	22		3		Earthquake		EM_DAT			1947-0028-GRC	1	nat-geo-ear-gro	Natural	Geophysical	Ground movement			GRC	Southern Europe	Europe		Tsunami/Tidal wave	0	0	0		8	Moment Magnitude		1947	10	6	1947	10	6	20		35000	35020
1949-04-19	Angol, Traiguan		Chile	-38	-74		35		Earthquake		EM_DAT			1949-0005-CHL	1	nat-geo-ear-gro	Natural	Geophysical	Ground movement			CHL	Latin America and the Caribbean	Americas		Tsunami/Tidal wave	0	0	0		7	Moment Magnitude		1949	4	19	1949	4	19	155			155					39000	514107
1949-04-13	Puget Sound, Olympia (Washington state)		United States of America	47	-123		8		Earthquake		EM_DAT			1949-0006-USA	1	nat-geo-ear-gro	Natural	Geophysical	Ground movement			USA	Northern America	Americas			0	0	0		7	Moment Magnitude		1949	4	13	1949	4	13									25000	329556
1950-08-03	El Tocuyo		Venezuela (Bolivarian Republic of)	11	-68		100		Earthquake		EM_DAT			1950-0029-VEN	1	nat-geo-ear-gro	Natural	Geophysical	Ground movement			VEN	Latin America and the Caribbean	Americas		Tsunami/Tidal wave	0	0	0		7	Moment Magnitude		1950	8	3	1950	8	3
1951-05-06	Jucuapa, Chinameca		El Salvador	13	-88		1100		Earthquake		EM_DAT			1951-0012-SLV	1	nat-geo-ear-gro	Natural	Geophysical	Ground movement			SLV	Latin America and the Caribbean	Americas			0	0	0		7	Moment Magnitude		1951	5	6	1951	5	6									23000	277537
1951-08-03	Potosi		Nicaragua	13	-88		500		Earthquake		EM_DAT			1951-0038-NIC	1	nat-geo-ear-gro	Natural	Geophysical	Ground movement			NIC	Latin America and the Caribbean	Americas		Tsunami/Tidal wave	0	0	0		6	Moment Magnitude		1951	8	3	1951	8	3
1954-07-02	Luzon, Sorsogon, Bacon, Legaspi		Philippines	13	124		13		Earthquake		EM_DAT			1954-0031-PHL	1	nat-geo-ear-gro	Natural	Geophysical	Ground movement			PHL	South-eastern Asia	Asia			0	0	0		7	Moment Magnitude		1954	7	2	1954	7	2	101			101
1957-11-30	Manam		Papua New Guinea	-4	145				Volcanic activity		EM_DAT			1957-0011-PNG	1	nat-geo-vol-ash	Natural	Geophysical	Ash fall		Manam	PNG	Melanesia	Oceania			0	0	0					1957	12		1957	12			3200		3200
1960-03-17	Manam		Papua New Guinea	-4	145				Volcanic activity		EM_DAT			1960-0011-PNG	1	nat-geo-vol-ash	Natural	Geophysical	Ash fall		Manam	PNG	Melanesia	Oceania			0	0	0					1960	3	17	1960	3	17		2000		2000
1962-03-18	Fier, Volre		Albania	41	20		15		Earthquake		EM_DAT			1962-0044-ALB	1	nat-geo-ear-gro	Natural	Geophysical	Ground movement			ALB	Southern Europe	Europe			0	0	0		6	Moment Magnitude		1962	3	18	1962	3	18	154			154
1964-03-27	Anchorage, Chitina, Glennallen, Homer, Hope, Kasilof, Kenai, Kodiak, Moose Pass, Portage, Seldovia, Seward, Sterling, Valdez, Wasilla, Whittier (Alaska)		United States of America	61	-147		131		Earthquake		EM_DAT			1964-0021-USA	1	nat-geo-ear-tsu	Natural	Geophysical	Tsunami			USA	Northern America	Americas		Tsunami/Tidal wave	0	0	0		9	Moment Magnitude		1964	3	27	1964	3	27									311000	3145318
1965-04-29	Seattle (Washington)		United States of America	47	-122		7		Earthquake		EM_DAT			1965-0024-USA	1	nat-geo-ear-gro	Natural	Geophysical	Ground movement			USA	Northern America	Americas			0	0	0		7	Moment Magnitude		1965	4	29	1965	4	29									28000	278761
1965-05-03	San Marcos		El Salvador	14	-89		125		Earthquake		EM_DAT			1965-0025-SLV	1	nat-geo-ear-gro	Natural	Geophysical	Ground movement			SLV	Latin America and the Caribbean	Americas			1	0	0		6	Moment Magnitude		1965	5	3	1965	5	3	1138	90582	48000	139720					35000	348451
1966-12-28	Taltal & Catalina		Chile	-25	-71		4		Earthquake		EM_DAT			1966-0090-CHL	1	nat-geo-ear-gro	Natural	Geophysical	Ground movement			CHL	Latin America and the Caribbean	Americas			1	0	0		8	Moment Magnitude		1966	12	28	1966	12	28	6	3000		3006					400	3866
1967-07-28	Caracas, Macuto coast		Venezuela (Bolivarian Republic of)	11	-67		240		Earthquake		EM_DAT			1967-0050-VEN	1	nat-geo-ear-gro	Natural	Geophysical	Ground movement			VEN	Latin America and the Caribbean	Americas		Tsunami/Tidal wave	1	0	0		7	Moment Magnitude		1967	7	28	1967	7	28	1536	80000		81536					140000	1316506
1968-08-15	Donggala		Indonesia	0	120		200		Earthquake		EM_DAT			1968-0064-IDN	1	nat-geo-ear-tsu	Natural	Geophysical	Tsunami			IDN	South-eastern Asia	Asia	Earthquake		0	0	0		8	Moment Magnitude		1968	8	15	1968	8	15
1970-03-23	Broach		India	22	73		26		Earthquake		EM_DAT			1970-0112-IND	1	nat-geo-ear-gro	Natural	Geophysical	Ground movement			IND	Southern Asia	Asia			0	0	0		5	Moment Magnitude		1970	3	23	1970	3	23	200			200
1976-07-14	Bali		Indonesia	-8	115		573		Earthquake		EM_DAT			1976-0047-IDN	1	nat-geo-ear-gro	Natural	Geophysical	Ground movement			IDN	South-eastern Asia	Asia			1	0	0		7	Moment Magnitude		1976	7	14	1976	7	14	4755	450000		454755					195000	1074875
1977-04-21	Guadalcanal, Honiara		Solomon Islands	-10	160		34		Earthquake		EM_DAT			1977-0059-SLB	1	nat-geo-ear-gro	Natural	Geophysical	Ground movement			SLB	Melanesia	Oceania		Slide (land, mud, snow, rock)|Tsunami/Tidal wave	0	0	0		7	Moment Magnitude		1977	4	21	1977	4	21	1	1000		1001
1979-09-12	Yapen, Jobi (Irian Jaja)		Indonesia	-2	136		2		Earthquake		EM_DAT			1979-0086-IDN	1	nat-geo-ear-gro	Natural	Geophysical	Ground movement			IDN	South-eastern Asia	Asia		Tsunami/Tidal wave	0	0	0		8	Moment Magnitude		1979	9	12	1979	9	12	5	5000		5005
1980-09-25	Tokyo, Kanto region		Japan	35	140		2		Earthquake		EM_DAT			1980-0092-JPN	1	nat-geo-ear-gro	Natural	Geophysical	Ground movement			JPN	Eastern Asia	Asia			0	0	0		6	Moment Magnitude		1980	9	25	1980	9	25	73			73					1000	3807
1981-02-24	Athens-Corinth area		Greece	38	23		22		Earthquake		EM_DAT			1981-0033-GRC	1	nat-geo-ear-gro	Natural	Geophysical	Ground movement			GRC	Southern Europe	Europe			1	0	0		7	Moment Magnitude		1981	2	24	1981	2	24	400	80000		80400					900000	3104977
1981-06-07	Mazara del Vallo area (Sicily)		Italy	38	12				Earthquake		EM_DAT			1981-0123-ITA	1	nat-geo-ear-gro	Natural	Geophysical	Ground movement			ITA	Southern Europe	Europe			0	0	0		5	Moment Magnitude		1981	6	7	1981	6	7	6	300		306
1982-12-25	Larantuka (Flores Isl.)		Indonesia	-8	123		13		Earthquake		EM_DAT			1982-0128-IDN	1	nat-geo-ear-gro	Natural	Geophysical	Ground movement			IDN	South-eastern Asia	Asia		Slide (land, mud, snow, rock)|Tsunami/Tidal wave	0	0	0		6	Moment Magnitude		1982	12	25	1982	12	25	417	6400	2000	8817					1450	4713
1983-10-15			Papua New Guinea	-4	152				Volcanic activity		EM_DAT			1983-0132-PNG	1	nat-geo-vol-ash	Natural	Geophysical	Ash fall		Rabaul	PNG	Melanesia	Oceania			1	0	0					1983	10	15	1983	10	15		25000		25000
1984-01-08	Mamuju (Central Sulawesi)		Indonesia	-3	119		2		Earthquake		EM_DAT			1984-0015-IDN	1	nat-geo-ear-gro	Natural	Geophysical	Ground movement			IDN	South-eastern Asia	Asia			0	0	0		6	Moment Magnitude		1984	1	8	1984	1	8	89	3425		3514					500	1510
1984-08-06	Kyushu (Shikoku Island)		Japan	33	130				Earthquake		EM_DAT			1984-0335-JPN	1	nat-geo-ear-gro	Natural	Geophysical	Ground movement			JPN	Eastern Asia	Asia		Tsunami/Tidal wave	0	0	0		7	Moment Magnitude		1984	8	6	1984	8	6	9			9
1986-09-13	Kalamata (Southwestern Peloppinos)		Greece	37	22		20		Earthquake		EM_DAT			1986-0113-GRC	1	nat-geo-ear-gro	Natural	Geophysical	Ground movement			GRC	Southern Europe	Europe			1	0	0		6	Moment Magnitude		1986	9	13	1986	9	13	300	45000		45300					745000	2132121
1986-10-10	San Salvador		El Salvador	13	-89		1100		Earthquake		EM_DAT			1986-0123-SLV	1	nat-geo-ear-gro	Natural	Geophysical	Ground movement			SLV	Latin America and the Caribbean	Americas			1	1	0		8	Moment Magnitude		1986	10	10	1986	10	10	20000	500000	250000	770000			225000	643929	1500000	4292861
1988-11-03	South		Guatemala	14	-90		5		Earthquake		EM_DAT			1988-0043-GTM	1	nat-geo-ear-gro	Natural	Geophysical	Ground movement			GTM	Latin America and the Caribbean	Americas		Slide (land, mud, snow, rock)	0	0	0		7	Moment Magnitude		1988	11	3	1988	11	3		500		500
1988-10-15	PALIN, SAN VICENTE PACAYA, Chamaltenango area		Guatemala	14	-90				Earthquake		EM_DAT			1988-0463-GTM	1	nat-geo-ear-gro	Natural	Geophysical	Ground movement			GTM	Latin America and the Caribbean	Americas			0	0	0		6	Moment Magnitude		1988	10	15	1988	10	15			1550	1550
1989-06-12	Banaripara area		Bangladesh	22	90		1		Earthquake		EM_DAT			1989-0071-BGD	1	nat-geo-ear-gro	Natural	Geophysical	Ground movement			BGD	Southern Asia	Asia			0	0	0		5	Moment Magnitude		1989	6	12	1989	6	12	100			100
1990-06-14	Cualasi area (Near Panay Isl.)		Philippines	12	122		4		Earthquake		EM_DAT			1990-0028-PHL	1	nat-geo-ear-gro	Natural	Geophysical	Ground movement			PHL	South-eastern Asia	Asia			0	0	0		7	Moment Magnitude		1990	6	14	1990	6	14	15			15
1990-06-16	Kanalaki		Greece	38	23				Earthquake		EM_DAT			1990-0217-GRC	1	nat-geo-ear-gro	Natural	Geophysical	Ground movement			GRC	Southern Europe	Europe			0	0	0		5	Moment Magnitude		1990	6	16	1990	6	16	1			1
1992-10-14	Manam Isl.		Papua New Guinea	-4	145				Volcanic activity		EM_DAT			1992-0146-PNG	1	nat-geo-vol-ash	Natural	Geophysical	Ash fall		Manam	PNG	Melanesia	Oceania			0	0	1					1992	10	14	1992	10	14
1992-12-12	Sikka, East Flores, Ende, Ngada (Flores Isl.)		Indonesia	-8	122		2500		Earthquake		EM_DAT			1992-0163-IDN	1	nat-geo-ear-gro	Natural	Geophysical	Ground movement			IDN	South-eastern Asia	Asia		Tsunami/Tidal wave	1	0	0	5209	8	Moment Magnitude		1992	12	12	1992	12	12	2103		90000	92103					100000	223558
1994-09-19	Eastern New Britain		Papua New Guinea	-4	152		5		Volcanic activity		EM_DAT			1994-0212-PNG	1	nat-geo-vol-ash	Natural	Geophysical	Ash fall		Rabaul	PNG	Melanesia	Oceania			1	0	0	1732				1994	9	19	1994	9	19	2	106000	46000	152002					110000	232793
1994-10-04	Iturup, Kunashir, Shikotan, Kuril Isl.		Russian Federation	45	148		11		Earthquake		EM_DAT			1994-0342-RUS	1	nat-geo-ear-gro	Natural	Geophysical	Ground movement			RUS	Eastern Europe	Europe		Tsunami/Tidal wave	0	0	0	1270	8	Moment Magnitude		1994	10	4	1994	10	4	242		2100	2342
1994-10-04	East coast of Hokaido Isl.		Japan	45	148		5		Earthquake		EM_DAT			1994-0343-JPN	1	nat-geo-ear-gro	Natural	Geophysical	Ground movement			JPN	Eastern Asia	Asia		Tsunami/Tidal wave	0	0	0		8	Moment Magnitude		1994	10	4	1994	10	4	1500			1500			11700	24761
1995-01-17	Kobe, Osaka, Hyigo, Kyoto prefecture		Japan	35	135		5297		Earthquake		EM_DAT			1995-0016-JPN	1	nat-geo-ear-gro	Natural	Geophysical	Ground movement			JPN	Eastern Asia	Asia		Fire	0	0	0	13557	7	Moment Magnitude		1995	1	17	1995	1	17	34492	255843	251301	541636			3000000	6175654	100000000	205855147
1995-02-23	Paphos, Nicosia areas		Cyprus	35	32		2		Earthquake		EM_DAT			1995-0034-CYP	1	nat-geo-ear-gro	Natural	Geophysical	Ground movement			CYP	Western Asia	Asia			0	0	0		6	Moment Magnitude		1995	2	23	1995	2	23	5	1710	150	1865					4340	8934
1995-05-19	Parigi, Palu, Poso (Sulawesi)		Indonesia	-1	121				Earthquake		EM_DAT			1995-0089-IDN	1	nat-geo-ear-gro	Natural	Geophysical	Ground movement			IDN	South-eastern Asia	Asia			0	0	0		6	Moment Magnitude		1995	5	19	1995	5	19	38	1500		1538
1995-11-22	Cairo		Egypt	29	35		10		Earthquake		EM_DAT			1995-0293-EGY	1	nat-geo-ear-gro	Natural	Geophysical	Ground movement			EGY	Northern Africa	Africa			0	0	0		6	Moment Magnitude		1995	11	22	1995	11	22	69			69
1996-09-05	Ston, Slano area		Croatia	43	18				Earthquake		EM_DAT			1996-0212-HRV	1	nat-geo-ear-gro	Natural	Geophysical	Ground movement			HRV	Southern Europe	Europe			1	0	0	219	6	Moment Magnitude		1996	9	5	1996	9	5			2000	2000
1996-10-06	Rabaul Town		Papua New Guinea	-4	152				Volcanic activity		EM_DAT			1996-0238-PNG	1	nat-geo-vol-ash	Natural	Geophysical	Ash fall		Tavurvur	PNG	Melanesia	Oceania			0	0	0					1996	10	6	1996	10	6		300		300
1996-12-04	Manam Isl.		Papua New Guinea	-4	145		4		Volcanic activity		EM_DAT			1996-0300-PNG	1	nat-geo-vol-ash	Natural	Geophysical	Ash fall		Manam	PNG	Melanesia	Oceania			0	0	0					1996	12	4	1996	12	4	29	1500		1529
1997-05-22	Arteaga, Patzcuaro, Michoacan		Mexico	18	-103				Earthquake		EM_DAT			1997-0116-MEX	1	nat-geo-ear-gro	Natural	Geophysical	Ground movement			MEX	Latin America and the Caribbean	Americas			0	0	0		6	Moment Magnitude		1997	5	22	1997	5	22		12000		12000
1998-07-17	Sandaun Province		Papua New Guinea	-3	142		2182		Earthquake		EM_DAT			1998-0220-PNG	1	nat-geo-ear-tsu	Natural	Geophysical	Tsunami			PNG	Melanesia	Oceania	Earthquake		1	0	0	6228	7	Moment Magnitude		1998	7	17	1998	7	17	668	9199		9867
1998-08-04	Canoa, Bahia de Caraquez, San Vicente, Bricenio, Jama, Chone, Santa Ana, Portoviejo, Montecristi, Manta, Charapoto, San Clemente, San Jacinto (Manabi province)		Ecuador	-1	-80		3		Earthquake		EM_DAT			1998-0353-ECU	1	nat-geo-ear-gro	Natural	Geophysical	Ground movement			ECU	Latin America and the Caribbean	Americas			0	1	0	293	7	Moment Magnitude		1998	8	4	1998	8	4	40	1250	750	2040
1999-07-22	Maheshkhali Isl. Level 1 = Chittagong Div		Bangladesh	22	92		6		Earthquake		EM_DAT			1999-0228-BGD	1	nat-geo-ear-gro	Natural	Geophysical	Ground movement			BGD	Southern Asia	Asia			0	0	0		5	Moment Magnitude		1999	7	22	1999	7	22	200		15000	15200
1999-08-17	Izmit, Kocaeli, Yalova, Golcuk, Zonguldak, Sakarya, Tekirdag, Istanbul, Bursa, Eskisehir, Bolu		Türkiye	41	30		17127		Earthquake		EM_DAT			1999-0268-TUR	1	nat-geo-ear-gro	Natural	Geophysical	Ground movement			TUR	Western Asia	Asia			1	0	1	116413	8	Moment Magnitude		1999	8	17	1999	8	17	43953	715000	600000	1358953	25000000	47079231	2000000	3766338	20000000	37663384
1999-04-03	Arequipa Area		Peru	-17	-73		1		Earthquake		EM_DAT			1999-0384-PER	1	nat-geo-ear-gro	Natural	Geophysical	Ground movement			PER	Latin America and the Caribbean	Americas		Slide (land, mud, snow, rock)	0	0	0		7	Moment Magnitude		1999	4	3	1999	4	3	50	1500		1550
1999-08-31	Izmit		Türkiye	41	30		1		Earthquake		EM_DAT			1999-0386-TUR	1	nat-geo-ear-gro	Natural	Geophysical	Ground movement			TUR	Western Asia	Asia			0	0	0		5	Moment Magnitude		1999	8	31	1999	8	31	166			166
1999-11-27	Pentecost, Ambrym, Paama, Epi Islands		Vanuatu	-16	168		12		Earthquake		EM_DAT			1999-0524-VUT	1	nat-geo-ear-gro	Natural	Geophysical	Ground movement			VUT	Melanesia	Oceania		Slide (land, mud, snow, rock)|Tsunami/Tidal wave	0	0	1	292	8	Moment Magnitude		1999	11	27	1999	11	27	100	12000	2000	14100
1999-12-21	Karyasari, Pandelang District (Southwest Jakarta, Java Island)		Indonesia	-7	106		5		Earthquake		EM_DAT			1999-0568-IDN	1	nat-geo-ear-gro	Natural	Geophysical	Ground movement			IDN	South-eastern Asia	Asia			0	0	0		7	Moment Magnitude		1999	12	21	1999	12	21	220	14000	2700	16920					3900	7344
2000-03-31	Abutatyoo, Datesi, Soobetutyoo districts (Hokkaidoo province)		Japan	35	139				Volcanic activity		EM_DAT			2000-0176-JPN	0	nat-geo-vol-ash	Natural	Geophysical	Ash fall		Mt. Isu	JPN	Eastern Asia	Asia			0	0	0					2000	3	31	2000	4	13		12400		12400
2000-10-25	Pandeglang, Lebak, Serang districts (Banten province)		Indonesia	-7	106				Earthquake		EM_DAT			2000-0761-IDN	0	nat-geo-ear-gro	Natural	Geophysical	Ground movement	USGS:usp000a2ck		IDN	South-eastern Asia	Asia			0	0	0		7	Moment Magnitude		2000	10	25	2000	10	25		5500		5500
2001-02-28	Seattle city (King district), Tacoma city (Pierce district), Olympia city (Thurston district) (Washington province)		United States of America	47	-123		1		Earthquake		EM_DAT			2001-0099-USA	0	nat-geo-ear-gro	Natural	Geophysical	Ground movement	USGS:uw10530748		USA	Northern America	Americas			0	0	0		7	Moment Magnitude		2001	2	28	2001	2	28	400			400			305000	540334	2000000	3543173
2001-03-24	Hirosima, Ehime provinces		Japan	34	133		2		Earthquake		EM_DAT			2001-0123-JPN	0	nat-geo-ear-gro	Natural	Geophysical	Ground movement	USGS:usp000abyg		JPN	Eastern Asia	Asia			0	0	0		7	Moment Magnitude		2001	3	24	2001	3	24	161	11100		11261			128000	226763	500000	885793
2001-06-08	Paama island (Malampa province)		Vanuatu	-17	168				Volcanic activity		EM_DAT			2001-0254-VUT	0	nat-geo-vol-ash	Natural	Geophysical	Ash fall		Lopevi	VUT	Melanesia	Oceania			0	0	0					2001	6	8	2001	6	8		4500		4500
2002-09-08	Wewak district (East Sepik province)		Papua New Guinea	-3	143		4		Earthquake		EM_DAT			2002-0577-PNG	0	nat-geo-ear-gro	Natural	Geophysical	Ground movement	USGS:usp000bbpf		PNG	Melanesia	Oceania		Tsunami/Tidal wave	0	0	0	53	8	Moment Magnitude		2002	9	8	2002	9	8	70	4400		4470
2003-05-26	Iwate, Miyagi, Yamagata, Akita, Aomori provinces		Japan	39	142				Earthquake		EM_DAT			2003-0249-JPN	0	nat-geo-ear-gro	Natural	Geophysical	Ground movement	USGS:usp000by66		JPN	Eastern Asia	Asia		Fire|Slide (land, mud, snow, rock)	0	0	0		7	Moment Magnitude		2003	5	26	2003	5	26	143	2160		2303			87000	148354	233000	397316
2003-08-13	Colon district (Colon province), Panama district (Panama province)		Panama	9	-80				Earthquake		EM_DAT			2003-0411-PAN	0	nat-geo-ear-gro	Natural	Geophysical	Ground movement	USGS:usp000c4rd		PAN	Latin America and the Caribbean	Americas			0	0	0		5	Moment Magnitude		2003	8	13	2003	8	13			340	340
2003-08-11	Wasile area (Halmahera Tengah district, Maluku Utara province)		Indonesia	1	128				Earthquake		EM_DAT			2003-0414-IDN	0	nat-geo-ear-gro	Natural	Geophysical	Ground movement	USGS:usp000c4kv		IDN	South-eastern Asia	Asia			0	0	0		6	Moment Magnitude		2003	8	11	2003	8	11		500		500
2003-09-22	Puerto Plata district (Puerto Plata province), San Francisco de Macoris district (Duarte province), Santiago district (Santiago province), Nagua district (Maria Trinidad Sanches province)		Dominican Republic	20	-71		3		Earthquake		EM_DAT			2003-0477-DOM	0	nat-geo-ear-gro	Natural	Geophysical	Ground movement	USGS:usp000c89d		DOM	Latin America and the Caribbean	Americas		Slide (land, mud, snow, rock)	0	0	0		6	Moment Magnitude		2003	9	22	2003	9	22	15	2000		2015
2004-11-11	Alor district (Nusatenggara Timur province)		Indonesia	-8	125		33		Earthquake		EM_DAT			2004-0562-IDN	0	nat-geo-ear-gro	Natural	Geophysical	Ground movement	GLIDE:EQ-2004-000121|USGS:usp000d85g		IDN	South-eastern Asia	Asia		Slide (land, mud, snow, rock)	1	1	0	1614	8	Moment Magnitude		2004	11	11	2004	11	11	311	83070		83381
2005-03-28	Simeulue, Aceh Singkil districts (Nangroe Aceh Darussalam province) Nias, Nias Selatan districts (Sumatera Utara province)		Indonesia	2	97		915		Earthquake		EM_DAT			2005-0160-IDN	0	nat-geo-ear-gro	Natural	Geophysical	Ground movement	GLIDE:EQ-2005-000053		IDN	South-eastern Asia	Asia		Tsunami/Tidal wave	1	0	0	3629	9	Moment Magnitude		2005	3	28	2005	3	28	1146	104167		105313
2005-04-19	Hukuoka, Saga provinces		Japan	34	130				Earthquake		EM_DAT			2005-0211-JPN	0	nat-geo-ear-gro	Natural	Geophysical	Ground movement	USGS:usp000dnsk		JPN	Eastern Asia	Asia		Slide (land, mud, snow, rock)	0	0	0		6	Moment Magnitude		2005	4	19	2005	4	19	58	837		895
2005-06-02	Aitavala, Masele, Kilenge, Ongaea, Potne, Sumel, Vem, Galegale, Tauale, Laut, Aimaga, Aipate, Gie villages (Gloucester district, West New Britain province)		Papua New Guinea	-4	145				Volcanic activity		EM_DAT			2005-0308-PNG	0	nat-geo-vol-ash	Natural	Geophysical	Ash fall	GLIDE:VO-2005-000085	Langila, Manam	PNG	Melanesia	Oceania			0	0	0					2005	6	2	2005	6	10		15000		15000
2005-11-27	Ambae island (Penama province)		Vanuatu	-17	168				Volcanic activity		EM_DAT			2005-0664-VUT	0	nat-geo-vol-ash	Natural	Geophysical	Ash fall		Mt. Ambae	VUT	Melanesia	Oceania			0	0	1					2005	11	27	2005	11	27		5000		5000
2006-03-20	Laalam village (Tamridjet district, Bejaia province)		Algeria	37	5		4		Earthquake		EM_DAT			2006-0149-DZA	0	nat-geo-ear-gro	Natural	Geophysical	Ground movement	GLIDE:EQ-2006-000038|USGS:usp000ecjv		DZA	Northern Africa	Africa			0	0	0		5	Moment Magnitude		2006	3	20	2006	3	20	9	160	150	319
2006-05-09	Paama, Ambrym villages (Malampa province)		Vanuatu	-17	168				Volcanic activity		EM_DAT			2006-0281-VUT	0	nat-geo-vol-ash	Natural	Geophysical	Ash fall		Lopevi	VUT	Melanesia	Oceania			0	0	0					2006	5	9	2006	5	9
2006-10-15	Hawai province		United States of America	20	-156				Earthquake		EM_DAT			2006-0704-USA	0	nat-geo-ear-gro	Natural	Geophysical	Ground movement	GLIDE:EQ-2006-000149|USGS:usp000ev94		USA	Northern America	Americas		Slide (land, mud, snow, rock)|Tsunami/Tidal wave	0	0	0		7	Moment Magnitude		2006	10	15	2006	10	15	10	3519		3529			40000	62242	150000	233409
2008-09-10	Tonban village (Geshm district, Hormozgan province), Roudan village (Rudan district, Hormozgan province)		Iran (Islamic Republic of)	27	56		6		Earthquake		EM_DAT			2008-0401-IRN	0	nat-geo-ear-gro	Natural	Geophysical	Ground movement	GLIDE:EQ-2008-000156|USGS:usp000ggsg		IRN	Southern Asia	Asia			0	0	0		6	Moment Magnitude		2008	9	10	2008	9	10	45	20500		20545
2009-01-03	Manokwari , Sorong districts (Papua Barat province)		Indonesia	0	133		5		Earthquake		EM_DAT			2009-0001-IDN	0	nat-geo-ear-gro	Natural	Geophysical	Ground movement	GLIDE:EQ-2009-000001|USGS:usp000gs2d		IDN	South-eastern Asia	Asia			0	0	0		8	Moment Magnitude		2009	1	3	2009	1	3	250	4000		4250					10000	14622
2009-08-10	Sizuokasi, Yaidusi, Sagaratyoo, Huziedasi, Simadasi, Kakegawasi, Haibaratyoo districts (Sizuola province), Tookyoo province		Japan	35	138		1		Earthquake		EM_DAT			2009-0320-JPN	0	nat-geo-ear-tsu	Natural	Geophysical	Tsunami	GLIDE:EQ-2009-000157|USGS:usp000h05y		JPN	Eastern Asia	Asia		Fire|Tsunami/Tidal wave	0	0	0		6	Moment Magnitude		2009	8	10	2009	8	10	319	25000		25319			250000	365542	400000	584867
2010-06-16	Yapen district (Papua province)		Indonesia	-2	137		17		Earthquake		EM_DAT			2010-0238-IDN	0	nat-geo-ear-gro	Natural	Geophysical	Ground movement	GLIDE:EQ-2010-000116|USGS:usp000he3f		IDN	South-eastern Asia	Asia		Slide (land, mud, snow, rock)	0	0	0		7	Moment Magnitude		2010	6	16	2010	6	16			4600	4600
2011-06-13	Canterbury, Nelson-marlborough, Otago, Southland, Westland provinces		New Zealand	-44	173		1		Earthquake		EM_DAT			2011-0388-NZL	0	nat-geo-ear-gro	Natural	Geophysical	Ground movement	USGS:usp000j33b		NZL	Australia and New Zealand	Oceania		Slide (land, mud, snow, rock)	0	0	0		6	Moment Magnitude		2011	6	13	2011	6	13	45		300	345			2000000	2789100	3000000	4183650
2011-10-28	Ica municipality (Ica district, Ica province), San Vicente de Canete municipality (Cañete district, Lima province)		Peru	-14	-76		1		Earthquake		EM_DAT			2011-0443-PER	0	nat-geo-ear-gro	Natural	Geophysical	Ground movement	USGS:usp000ja1p		PER	Latin America and the Caribbean	Americas			0	0	0		7	Moment Magnitude		2011	10	28	2011	10	28	106	870	1705	2681
2012-02-06	Tayasan area (Negros Oriental district, Region VII (Central Visayas) province)		Philippines	10	123		113		Earthquake		EM_DAT			2012-0031-PHL	0	nat-geo-ear-gro	Natural	Geophysical	Ground movement	GLIDE:EQ-2012-000018|USGS:usp000jejw		PHL	South-eastern Asia	Asia		Slide (land, mud, snow, rock)	0	0	0	220	7	Moment Magnitude		2012	2	6	2012	2	6	112	320165		320277					8900	12160
2014-01-26	Lixouri, Kounopetra, Fiskardo villages (Kefalonia Isl., Kefallinias district, Ionioi Nisoi province)		Greece	38	20				Earthquake		EM_DAT			2014-0049-GRC	0	nat-geo-ear-gro	Natural	Geophysical	Ground movement	USGS:usb000m8ch		GRC	Southern Europe	Europe			0	0	1		6	Moment Magnitude		2014	1	26	2014	2	3	23	2000		2023			8000	10600	178000	235860
2014-07-07	Huehuetenango, Quetzaltenango, Retalhuleu, San Marcos, Solola, Suchitepequez, Totonicapan provinces		Guatemala	15	-92		1		Earthquake		EM_DAT			2014-0234-GTM	0	nat-geo-ear-gro	Natural	Geophysical	Ground movement	GLIDE:EQ-2014-000096|USGS:usc000rr6a		GTM	Latin America and the Caribbean	Americas			0	0	1		7	Moment Magnitude		2014	7	7	2014	7	7	274	84679	9830	94783
2014-07-07	Chiapas province		Mexico	15	-92		3		Earthquake		EM_DAT			2014-0234-MEX	0	nat-geo-ear-gro	Natural	Geophysical	Ground movement	GLIDE:EQ-2014-000096|USGS:usc000rr6a		MEX	Latin America and the Caribbean	Americas			0	0	0		7	Moment Magnitude		2014	7	7	2014	7	7		27000		27000
2014-03-12	Anjouan province		Comoros	-12	44				Earthquake		EM_DAT			2014-0258-COM	0	nat-geo-ear-gro	Natural	Geophysical	Ground movement	USGS:usc000n9m9		COM	Sub-Saharan Africa	Africa		Slide (land, mud, snow, rock)	1	0	0		5	Moment Magnitude		2014	3	12	2014	3	12		10000		10000
2016-01-16	Maluku, Maluku Utara provinces		Indonesia	-4	127				Earthquake		EM_DAT			2016-0019-IDN	0	nat-geo-ear-gro	Natural	Geophysical	Ground movement			IDN	South-eastern Asia	Asia			0	0	0		6	Moment Magnitude		2016	1	16	2016	1	16	8	360		368
2016-12-07	Pidie Jaya district (Nangroe Aceh Darussalam province, Sumatra Isl.)		Indonesia	5	96		104		Earthquake		EM_DAT			2016-0475-IDN	0	nat-geo-ear-gro	Natural	Geophysical	Ground movement	GLIDE:EQ-2016-000127		IDN	South-eastern Asia	Asia			0	1	0		7	Moment Magnitude		2016	12	7	2016	12	7	857	85161		86018					100000	130700
2017-04-08	Verde Island Passage (Tingloy, Maricaban Island). Batangas and Laguna provinces		Philippines	14	121				Earthquake		EM_DAT			2017-0140-PHL	0	nat-geo-ear-gro	Natural	Geophysical	Ground movement			PHL	South-eastern Asia	Asia		Slide (land, mud, snow, rock)	0	0	0		6	Moment Magnitude		2017	4	8	2017	4	8		25000		25000					2000	2559
2018-02-06	Hualian		Taiwan (Province of China)	24	122		84		Earthquake		EM_DAT			2018-0059-TWN	0	nat-geo-ear-gro	Natural	Geophysical	Ground movement			TWN	Eastern Asia	Asia			0	0	0		6	Moment Magnitude		2018	2	6	2018	2	6	285			285					100000	124923
2019-05-14	New Ireland, New Britain, Duke of York Islands		Papua New Guinea	-4	153				Earthquake		EM_DAT			2019-0271-PNG	0	nat-geo-ear-gro	Natural	Geophysical	Ground movement	GLIDE:EQ-2019-000045		PNG	Melanesia	Oceania			0	0	0		8	Moment Magnitude		2019	5	14	2019	5	14	1	650		651
2019-07-13	Cantilan, Carmen, Carrascal, Lanuza, Madrid (Surigao del Sur)		Philippines	9	126				Earthquake		EM_DAT			2019-0356-PHL	0	nat-geo-ear-gro	Natural	Geophysical	Ground movement			PHL	South-eastern Asia	Asia			0	0	0		6	Moment Magnitude		2019	7	13	2019	7	13	52	9525		9577
2019-11-26	Durrës, Kruje, Tiranë, Lezhë		Albania	42	20		51		Earthquake		EM_DAT			2019-0572-ALB	0	nat-geo-ear-gro	Natural	Geophysical	Ground movement	GLIDE:EQ-2019-000157		ALB	Southern Europe	Europe			0	0	0		6	Moment Magnitude		2019	11	26	2019	11	26	913	202000		202913					700000	858892
2020-01-07	Ponce City, San Juan, Yauco, Guayanilla, Lajas, Guanica		Puerto Rico	18	-67		4		Earthquake		EM_DAT			2020-0007-PRI	0	nat-geo-ear-gro	Natural	Geophysical	Ground movement	GLIDE:EQ-2020-000001		PRI	Latin America and the Caribbean	Americas		Tsunami/Tidal wave	0	0	0		6	Moment Magnitude		2020	1	7	2020	1	7	8	4170	900	5078			400000	484815	800000	969630
2022-01-14	Banten, Jawa Barat		Indonesia	-7	105				Earthquake		EM_DAT			2022-0042-IDN	0	nat-geo-ear-gro	Natural	Geophysical	Ground movement	GLIDE:EQ-2022-000004		IDN	South-eastern Asia	Asia			0	0	0		7	Moment Magnitude		2022	1	14	2022	1	14	1975	13415		15390					23000	24653
2022-01-24	Nippes Department		Haiti	18	-73		2		Earthquake		EM_DAT			2022-0057-HTI	0	nat-geo-ear-gro	Natural	Geophysical	Ground movement	GLIDE:EQ-2022-000150		HTI	Latin America and the Caribbean	Americas			0	0	0		5	Moment Magnitude		2022	1	24	2022	1	24	52	15	950	1017
2023-03-18	El Oro, Guayas, and Azuay		Ecuador	-3	-80		14		Earthquake		EM_DAT			2023-0155-ECU	0	nat-geo-ear-gro	Natural	Geophysical	Ground movement	GLIDE:EQ-2023-000038		ECU	Latin America and the Caribbean	Americas			0	0	0		7	Moment Magnitude		2023	3	18	2023	3	18	494	126922		127416
2023-03-18	Tumbes		Peru	-3	-80		1		Earthquake		EM_DAT			2023-0155-PER	0	nat-geo-ear-gro	Natural	Geophysical	Ground movement	GLIDE:EQ-2023-000038		PER	Latin America and the Caribbean	Americas			0	0	0		7	Moment Magnitude		2023	3	18	2023	3	18	1	140		141
2023-05-06	Ishikawa		Japan	38	137		1		Earthquake		EM_DAT			2023-0279-JPN	0	nat-geo-ear-gro	Natural	Geophysical	Ground movement	GLIDE:EQ-2023-000065		JPN	Eastern Asia	Asia		Slide (land, mud, snow, rock)	0	0	0		6	Moment Magnitude		2023	5	6	2023	5	6	43	2157	54	2254
2024-04-03	Hualien region		Taiwan (Province of China)	24	122		20		Earthquake		EM_DAT			2024-0189-TWN	0	nat-geo-ear-gro	Natural	Geophysical	Ground movement			TWN	Eastern Asia	Asia		Slide (land, mud, snow, rock)|Tsunami/Tidal wave	0	0	0		7	Moment Magnitude		2024	4	3	2024	4	3	1145	891	333	2369					2530000	2530000
Date				Lat	Lon		AFFECTED				SOURCE				Code	FID
2003-08-19	Ferrel	PENICHE	Portugal	39.374	-9.33123		1				Portugal DISASTER			looks like a cliff	1814	10
2005-08-04	Ferrel	PENICHE	Portugal	39.374	-9.33123		2				Portugal DISASTER			looks like a cliff	1834	11
1954-11-01	Nazare	NAZARE	Portugal	39.6034	-9.07642		2				Portugal DISASTER			looks like a cliff	830	43
2009-08-21	Albufeira e Olhos de Água	ALBUFEIRA	Portugal	37.0883	-8.19834		8				Portugal DISASTER			looks like a cliff	1906	2
1998-03-22	Albufeira e Olhos de Água	ALBUFEIRA	Portugal	37.0727	-8.29813		1				Portugal DISASTER			looks like a cliff	1696	1
2010-10-11	Lagoa e Carvoeiro	LAGOA	Portugal	37.0898	-8.40594		1				Portugal DISASTER			looks like a cliff	1918	3
2010-05-26	Portimao	PORTIMAO	Portugal	37.1198	-8.56085		1				Portugal DISASTER			looks like a cliff	1917	4
2003-08-19	Colares	SINTRA	Portugal	38.84	-9.46312		1				Portugal DISASTER			looks like a cliff	1827	49
2006-07-23	São João das Lampas e Terrugem	SINTRA	Portugal	38.8638	9.4494		1				Portugal DISASTER			looks like a cliff	1877	51
1918-01-10	Vita Sikudden, Getå	Östergötland county/Norrköping	Sweden	58.6617	16.2666						SGI Landslide database	https://gis.sgi.se/hajk/?m=skred	Area (m2): 3500 Occurrence of artesian groundwater?: true Soil types: alluvial gravel, sand Injuries: Rail, Fatalities, Road, Injuries
9/20/1886	Kalmar county/Västervik/		Sweden	57.7666	16.6268						SGI Landslide database	https://gis.sgi.se/hajk/?m=skred	Area (m2): 4400, Soil types: clay, Damage: Deaths, Buildings
1916-06-30	Södertälje channel	Stockholm	Sweden	59.1793	17.6568						SGI Landslide database	https://gis.sgi.se/hajk/?m=skred	Area (m2): 2500 Injuries: Deaths, Injuries
2005-01-09	La Conchita	La Conchita	United States	34.3634	-119.447	exact	10		rainfall	0	Global Fatal Landslide Database	https://en.wikipedia.org/wiki/La_Conchita_landslides#2005_La_Conchita_landslide	A huge mudslide crashed down on a coastal hamlet killing two people injuring nine and leaving at least six missing as Southern California's saturated terrain began to give way under the onslaught of drenching storms that have sent rainfall totals to as
2016-07-04	Hon Gai	Quang Ninh	Vietnam	20.95	107.07		1		rainfall	0	Global Fatal Landslide Database	https://vietnamnet.vn/en/two-dead-in-heavy-rainfall-in-quang-ninh-E160045.html	The victims included Tran Van Thanh 52 living in Hong Gai Ward who was killed when a section of the embankment collapsed over him in his house’s kitchen.
2022-08-08	Hutchinson Island	Florida	United States	27.1978	-80.1648	3	1	unknown		0	Media (Spanish)	https://es.gizmodo.com/un-fotografo-muere-engullido-por-una-duna-de-arena-mien-1849404517 https://www.tcpalm.com/story/news/local/martin-county/2022/08/08/man-found-dead-likely-died-sand-dune-collapse-detectives-say/10270360002/	All indications are that Nagel was lying under a cliff when a sand dune completely buried him.
2024-08-25	Nørre Vorupør	Thy	Denmark	56.9596	8.36534	2	2	tourist		0	Media (Portugese)	https://www.jn.pt/4562557710/duas-criancas-alemas-morrem-em-deslizamento-de-terras-numa-praia-na-dinamarca/	dune sand	The children aged nine and 12 were digging a hole on a beach in northern Jutland on Sunday when the dune collapsed burying them.
2006-11-23	Port Antonio	Portland	Jamacia				1		rainfall	0	Global Fatal Landslide Database		A landslide triggered by days of heavy rain destroyed a house in eastern Jamaica on Friday killing one woman police said. The victim Pauline Bailey 55 died when the hillside above the house in Port Antonio gave way shortly after midnight police s
2005-11-13	Bequia		Saint Vincent and the Grenadines				2		rainfall	0	Global Fatal Landslide Database		The 27th tropical depression of the 2005 hurricane season is already being blamed for two deaths on the island of St. Vincent & the Grenadines. Authorities yesterday claimed two fishermen who were camping with eight others near Rocky Bay on the Grenadin
2009-10-31	Playa de los Gigantes	Tenerife	Spain				2		unknown	0	Global Fatal Landslide Database		A landslide has killed at least two people one of them a British women and may have buried another two on the popular holiday island of Tenerife in the Canary Islands the Spanish government has said.
2012-02-04	Al Rams	Ras Al Khaimah	UAE				1		mining (unknown)	0	Global Fatal Landslide Database	https://www.constructionweekonline.com/business/article-15529-pakistani-quarry-worker-crushed-as-hill-collapses	A Pakistani national was killed on a quarry site on Sunday when part of a hill he was excavating collapsed on top of him in Al Rams Ras Al Khaimah. Two other men also Pakistani nationals were seriously injured in the accident which saw boulders tum
2005-07-25	London Pilsner	Navi Mumbai	India				12		rainfall	0	Global Fatal Landslide Database		In Saki Naka area of Mumbai where several people died in a massive landslide rescue operations were still on. About 135 hutments were crushed under boulders following a landslide on Wednesday police said.
2010-10-09	White Sand beach	Trat	Thailand				1		rainfall	0	Global Fatal Landslide Database		A mudslide on Thailand's popular Chang Island killed at least one person Monday and swept away several bungalows media reports said. Torrential rains that started Sunday night washed away part of the mountainside near White Sand beach hitting the ring
2011-09-26	Barangay Mabayuan	Olongapo	Philippines				1		rainfall	0	Global Fatal Landslide Database		The landslide forced a riprap to collapse on a house and killed its occupant Rya
2014-12-08	Barangay Poblacion	Puerto Galera	Philippines				1		rainfall	0	Global Fatal Landslide Database		A man died in a landslide in Puerto Galera Oriental Mindoro on Tuesday. The victim 20-year-old David John Blanca died after a portion of a riprap collapsed and buried his road-side store in Barangay Poblacion.
2013-02-25	Mati City	Davao Oriental	Philippines				7		rainfall	0	Global Fatal Landslide Database	https://newsinfo.inquirer.net/365425/3-killed-in-mati-city-landslide	A landslide struck and covered part of the national highway in Mati City Davao Oriental along with two motorcycles and a jeepney burying alive seven persons with four already confirmed dead.
2011-02-21	Sumner		New Zealand				3		earthquake	0	Global Fatal Landslide Database		In Sumner police cordoned off the Wakefield Ave scene where a builder was killed by rockfall.
2025-08-16	Henderson Beach	New Richmond	Canada	48.1346	-65.8246	0.5	1	local		0	Media	https://globalnews.ca/news/11337953/quebec-senior-dies-beach-landslide-gaspe-peninsula/
[truncated: 4 more columns]
